# Supplementary material
Source: PubMed Central journal article supplement (PMC4981130)
Supplement: supp_tpc.16.00105_TPC2016-00105-RAR1_Supplemental_Data_pdf.pdf [file supp_tpc.16.00105_TPC2016-00105-RAR1_Supplemental_Data_pdf.pdf]

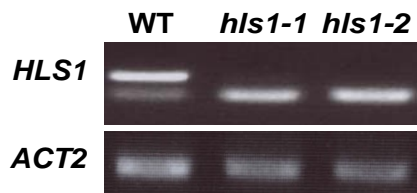

**Supplemental Figure 1. The *hls1* mutants lack *HLS1* expression.** The 3-day-old *hls1* mutant seedlings grown on 1/2 MS medium were collected and RNA was extracted for reverse transcription (RT)-PCR. Results displayed that *hls1* mutants are unable to produce *HLS1* RNA. The amplification of *ACT2* PCR products was used as a control.

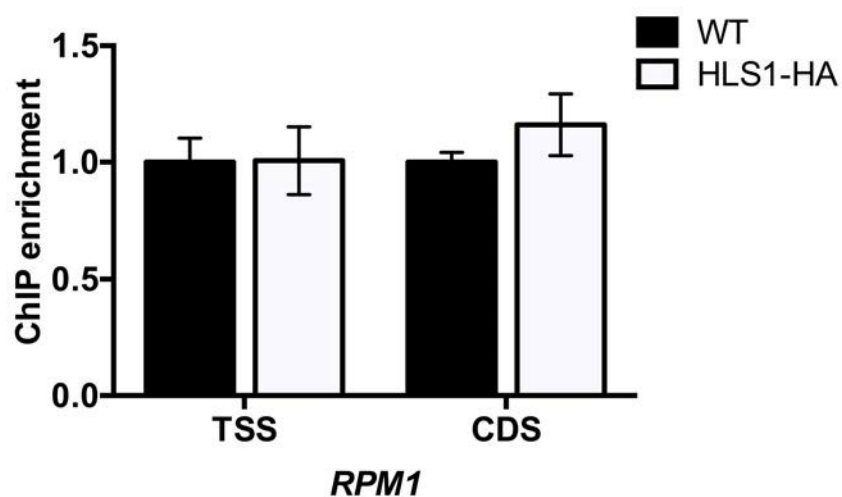

**Supplemental Figure 2. HLS1 protein is not associated with resistance gene *RPM1*.** Samples were collected from wild type (WT) and plants overexpressing *HLS1* for ChIP-qPCR assays. The TSS and CDS regions of *RPM1* were tested and the association of protein from wild type with *RPM1* is set to 1 as a background control. The experiment was repeated two times with similar results. The data represent mean values  $\pm$  SE (n=3). TSS: transcriptional start site; CDS: 3'-coding DNA sequence region.

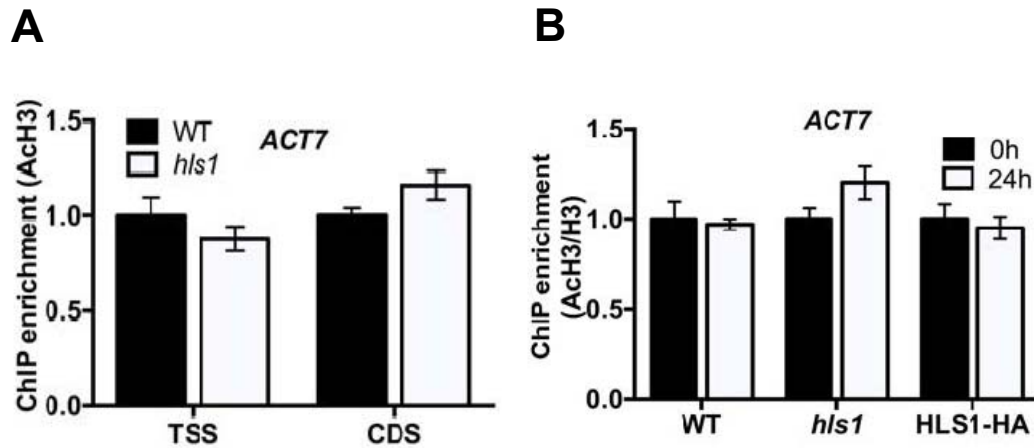

**Supplemental Figure 3. The histone H3 acetylation at *ACTIN7* chromatin shows no difference between wild-type and *hls1* plants.**

ChIP-qPCR assay was performed using antibodies that recognize acetylated histone H3 and histone H3. (A) Two different regions of *ACTIN7* were amplified by qPCR. The enrichment of *ACTIN7* in wild-type plants was set to 1 as a background control in ChIP-qPCR assay. (B) The TSS region of *ACTIN7* was selected and the H3 acetylation status is normalized with histone H3 from each sample. The enrichment of *ACTIN7* in wild type at 0 hour is set to 1 as a background control in the assay. The data represent mean values  $\pm$  SE (n=3). Wild type (WT); Transcription start site (TSS); 3'-coding DNA sequence (CDS); *ACTIN7* (*ACT7*).

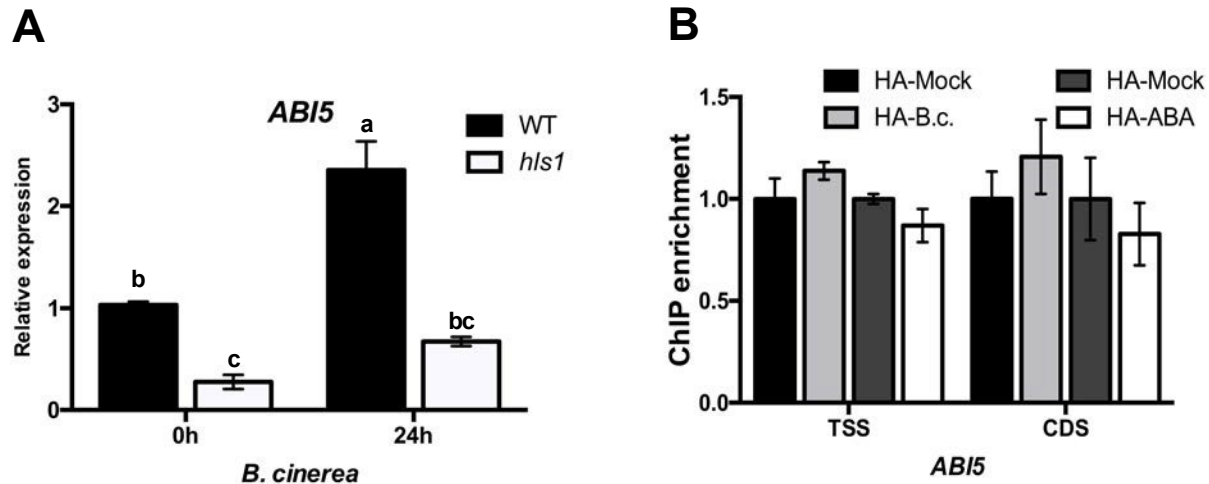

**Supplemental Figure 4. The recruitment of HLS1 protein to the *ABI5* locus is not enhanced by *B. cinerea* inoculation.**

(A) *ABI5* induction is modulated in *hls1* mutants after inoculation with *B. cinerea*. The expression of *ABI5* in WT is set to 1. The statistically significant differences are indicated by different letters (least squares means post hoc test:  $P < 0.05$ ).

(B) HLS1 is unable to enhance the association of *ABI5* gene after inoculation with *B. cinerea* or treatment with ABA. The association of 35S:HLS1-HA with *ABI5* under mock treatment is set to 1 as a background control in ChIP-qPCR assay. The data represent mean values  $\pm$  SE (n=3). TSS: transcription start site; CDS: 3'-coding DNA sequence region.

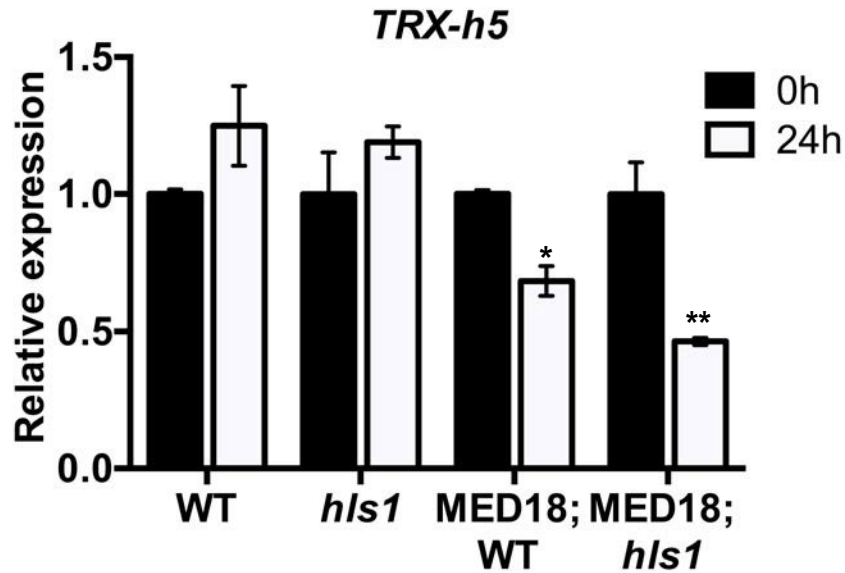

**Supplemental Figure 5. MED18-mediated plant resistance through *TRX-h5* regulation is HLS1-independent.**

*TRX-h5* is regulated in response to *B. cinerea* inoculation. The expression is reduced and the pattern is similar between transgenic plants overexpressing MED18 in a wild type or *hls1* mutant background. Gene expression at 0 hour is set to 1. The data represent mean values  $\pm$  SE (n=3) and the statistically significant differences are indicated by asterisks (Student's *t*-test: \*P<0.05, \*\*P<0.01).

**A**

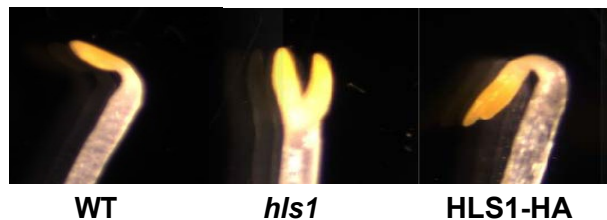

**B**

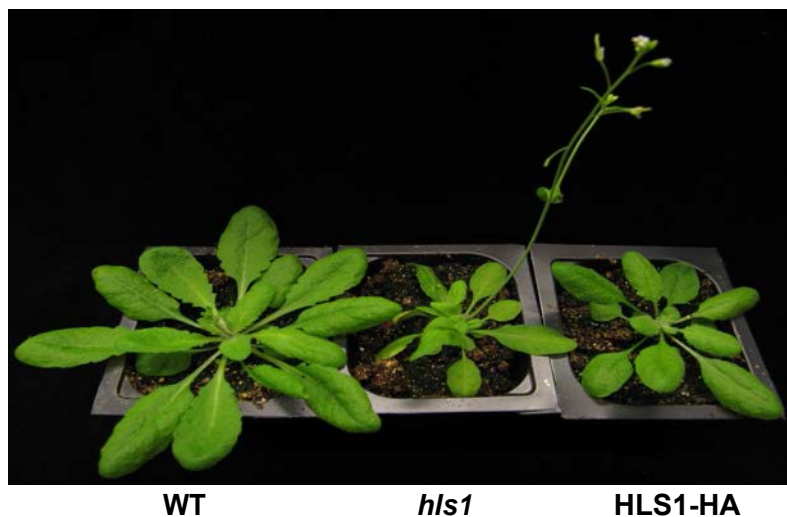

**Supplemental Figure 6. Overexpressing *HLS1-HA* in Arabidopsis shows developmental phenotypes opposite to the *hls1* mutant.**

(A) The hook phenotype in wild-type, *hls1*, and 35S:*HLS1HA* (*HLS1-HA*) plants 5 days after germination.

(B) *HLS1* regulates flowering time in Arabidopsis. The photo was taken of 5-week-old plants, demonstrating early flowering of the *hls1* mutant but delayed flowering of the *HLS1-HA* plants. WT: wild type.

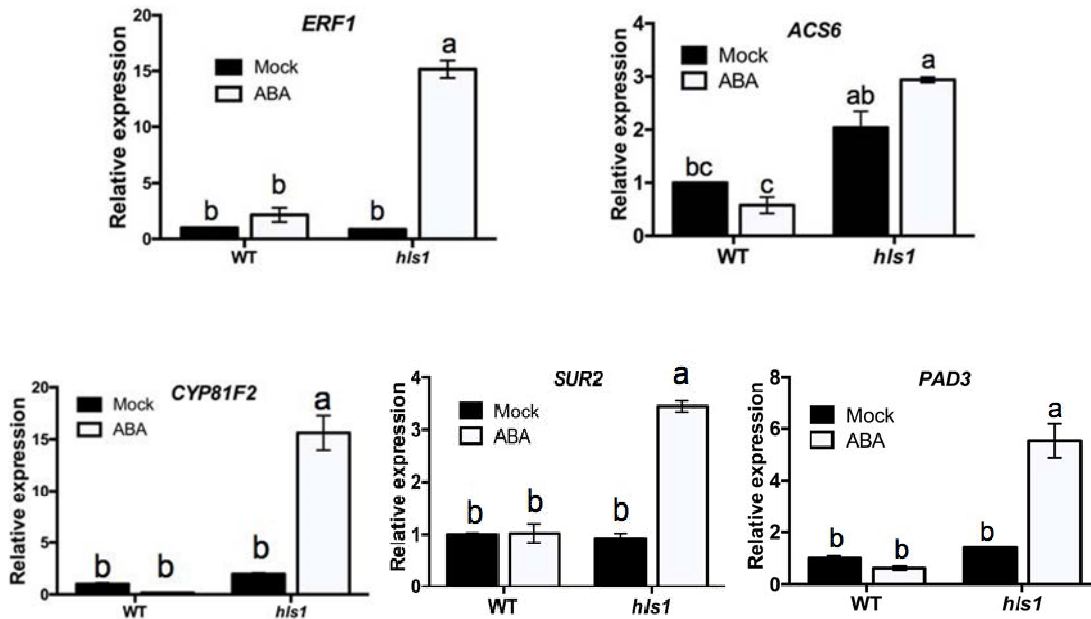

**Supplemental Figure 7. Expression of defense-related genes is induced in the *his1* mutant in response to ABA.** The expression of genes in the wild type after mock inoculation is set to 1. The data represent mean values  $\pm$  SE (n=3) from two independent experiments and statistically significant differences are indicated by different letters (least squares means post hoc test: P<0.05).

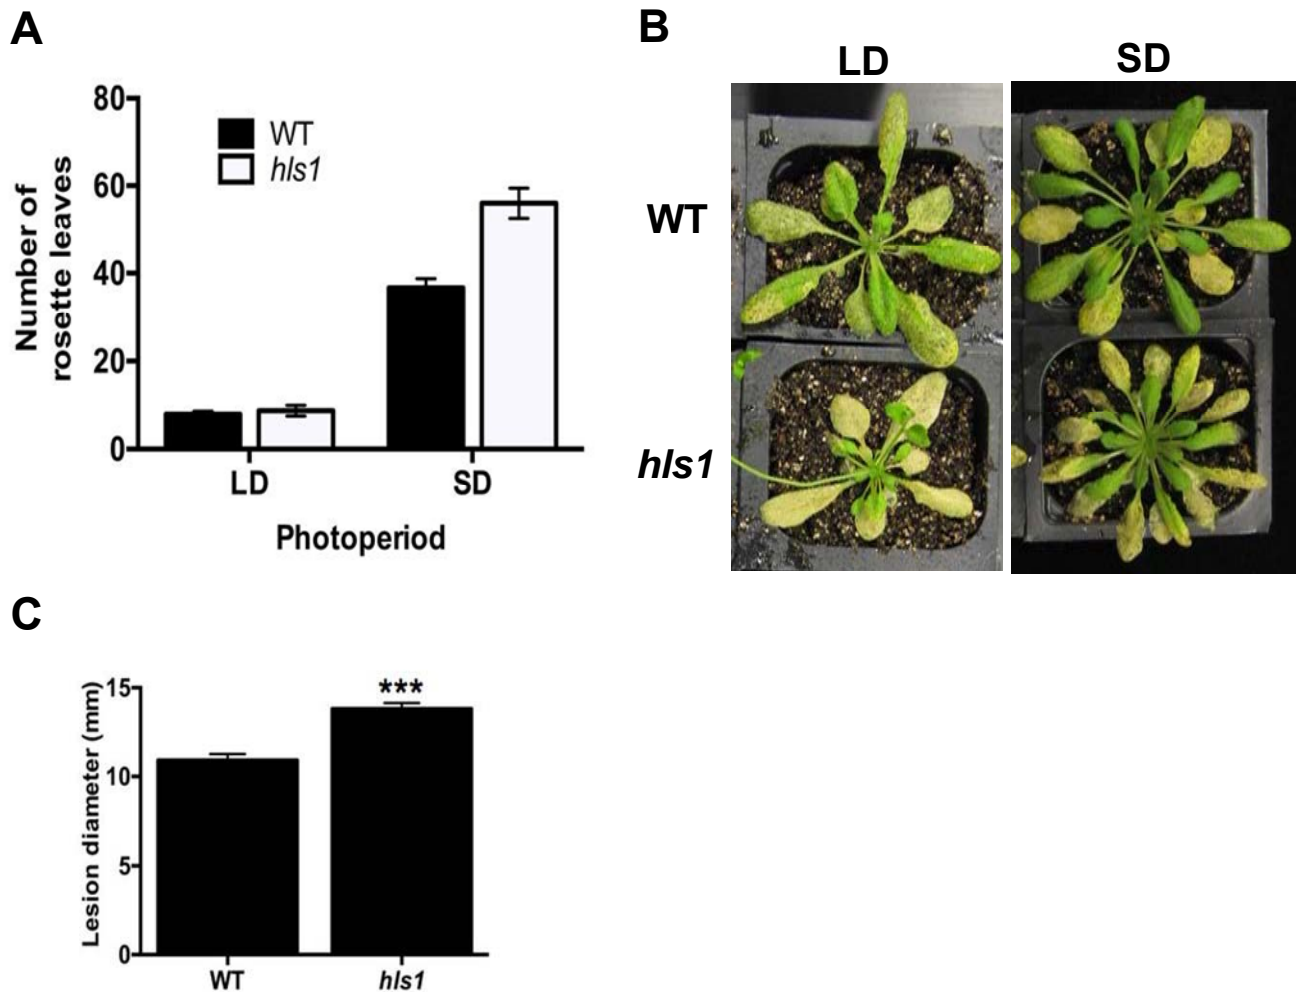

**Supplemental Figure 8. Leaf number, but not disease phenotype, is affected by HLS1 under short day conditions.**

(A) Plants were grown under a long day (LD; 12 h light : 12 h dark) or short day (SD; 8 h light : 16 h dark) photoperiod. Leaf number was counted before blotting. The data represent mean values  $\pm$  SD ( $n=15$ ) and the experiment was repeated two times with similar results. The statistically significant difference is indicated by asterisks (Student's *t*-test, \*\*\* $P<0.001$ ).

(B) Plants were spray-inoculated with *B. cinerea* conidia and photos were taken at 5 dai and

(C) The enhanced lesion development in *hls1* mutant plants was measured at 3 dai.



Supplemental Table 1. Primers used in this study.

| Gene Name                | Sequence (5' to 3')                    |
|--------------------------|----------------------------------------|
| <b>Molecular Cloning</b> |                                        |
| HLS1-HA FP               | GCTCTAGAATGACGGTGGTTAGAGAGTAC          |
| HLS1-HA RP               | TCCCCCGGGAAATTCTCTAGGGTCTACAA          |
| HLS1-GFP FP              | GAAGATCTATGGCGAGTTCGGAGGTTTCA          |
| HLS1-GFP RP              | GGGGTACCTTAAAATTCTCTAGGGTC             |
| GST-HLS1 FP              | CCGGAATTCATGACGGTGGTTAGAGAGTAC         |
| GST-HLS1 RP              | ATAGTTTAGCGGCCGCTTAAAATTCTCTAGGGTCTACA |
| HLS1-HA TM1 FP           | GGGGTACCATGACGGTGGTTAGAGAGTA           |
| HLS1-HA TM1 RP           | CGACGTCGACAAATTCTCTAGGGTCTACAA         |
| pWRKY33-GUS FP           | GATCGCCGGCTTAACTATTAATGATTCTGG         |
| pWRKY33-GUS RP           | CCGGAATTCGTTTTATAAAAGACCAATTC          |
| pABI5p-GUS FP            | TCCTGACCCAAACCGTACTC                   |
| pABI5p-GUS RP            | AGGCAACAAGGAACACACGA                   |
| <b>RT-qPCR</b>           |                                        |
| Bc ACTIN A qFP           | ACTCATATGTTGGAGATGAAGCGCA              |
| Bc ACTIN A qRP           | AATGTTACCATACAAATCCTTACGGA             |
| At ACTIN 2 qFP           | GACCTTTAACTCTCCCGCTATG                 |
| At ACTIN 2 qRP           | AAACCCTCGTAGATTGGCAC                   |
| PR1 qFP                  | TTCTTCCCTCGAAAGCTCAA                   |
| PR1 qRP                  | ACTTTGGCACATCCGAGTCT                   |
| RPM1 qFP                 | AGGGATTGATGCACCCAAGG                   |
| RPM1 qRP                 | CCTCCGCACACTTTGAGACT                   |
| RIN4 qFP                 | GGACGAGAACAACCCGTCAT                   |
| RIN4 qRP                 | TGTTGTTCCGGTTACGGGAG                   |
| ERF1 qFP                 | GAGACGGAGAATGACCAATAAG                 |
| ERF1 qRP                 | CTGTTCTCCCAAATCCTCAA                   |
| PDF1.2 qFP               | TGCTTCCATCATCACCTTA                    |
| PDF1.2 qRP               | CACTTGTGTGCTGGGAAGAC                   |
| CYP81F2 qFP              | CGTGTCTGTTGCGACTTTA                    |
| CYP81F2 qRP              | TGGCAAACGGCTCGTAATTG                   |
| CYP79B3 qFP              | GGCACTCTCTGATACGACCG                   |
| CYP79B3 qRP              | TTATCGCCGTACCTAACGCC                   |
| PAD3 qFP                 | AGAAGCAAGAGAACGATGGAG                  |
| PAD3 qRP                 | GGGAATGACCGAGCTGATC                    |
| SUR2 qFP                 | TTGTACGAGACGCAAGCACT                   |
| SUR2 qRP                 | TTGAGACGTGCACTGAGACC                   |
| WRKY33 qFP               | AATGGTGGTGGGAAGCAAGAC                  |
| WRKY33 qRP               | CAGATGCTGCACAACAACA                    |
| ACS2 qFP                 | TCATGTTCTGCCTTGCGGAT                   |
| ACS2 qRP                 | CTTCCTCGTGACAAACCGGA                   |
| ACS6 qFP                 | AAGCTCAACGTGTCTCCAGG                   |
| ACS6 qRP                 | GTTGTTGCAGCCATCGGTTT                   |

|                        |                                    |
|------------------------|------------------------------------|
| ABI3 qFP               | GTAAGACAACCGAGCGGACA               |
| ABI3 qRP               | TAACTCTCCGTTCGGCGAATG              |
| RD29a qFP              | TCGCCACATTCTGTTGAAGAGGCT           |
| RD29a qRP              | TGGAGCCAAGTGATTGTGGAGACT           |
| KAT2 qFP               | TGCACA AGCGCAGAATTGTC              |
| KAT2 qRP               | TTGCTCCTGCCTTGAGACAC               |
| WRKY40 qFP             | AACCGCCACATCTCTCATGG               |
| WRKY40 qRP             | TCGATTCTTGACGTTGGGCT               |
| HY5 qFP                | CTGAAGAACAACAACAGGAAACAAG          |
| HY5 qRP                | TTGCAATATTAGCTCTCACATCCC           |
| HLS1 qFP               | CACGGTTATCAAGTTAGAGC               |
| HLS1 qRP               | GAAAGTCCCAAGCGAGA                  |
| <b>ChIP-qPCR</b>       |                                    |
| WRKY33 Pro FP          | TTTTTGAGCAAGAGCCAAGAAT             |
| WRKY33 Pro RP          | GGCTCAATGCTTTCATCATCTT             |
| WRKY33 TATA FP         | TTTTCTTCTTCTCCAAGCCCC              |
| WRKY33 TATA RP         | TGGTCACAACAATCCGGAAGAA             |
| WRKY33 3'CDS FP        | GAGCACACAGGATTTCGTCT               |
| WRKY33 3'CDS RP        | GGGCCTTTTGTTACGCCAT                |
| RPM1 TATA FP           | GTGGCAGGCATGTAAGGTGT               |
| RPM1 TATA RP           | AGTAGCCGAAGCCATCTTCC               |
| RPM1 3'CDS FP          | TGTCAGGGCTTGTAGAGGGT               |
| RPM1 3'CDS RP          | TTCTCCGCGAATGCGTTCTA               |
| ABI5 ABS FP            | CTCCGGCGGCTTTTAAACTATGT            |
| ABI5 ABS RP            | TTATTTAACAGTCTTCTAATCCAAGATC       |
| ABI5 TATA FP           | TGTTGACCTTCACGCCTCTC               |
| ABI5 TATA RP           | AAAGCCGCCGGAGAATTTTG               |
| ABI5 3'CDS FP          | TCGGAGACAGAACGAGGGAA               |
| ABI5 3'CDS RP          | GGTGTTCTCCTACCAACACA               |
| ACT2 TATA FP           | TGTAACACGCGGATCGAGCA               |
| ACT2 TATA RP           | AACGTGACCTGGCTGTCAGA               |
| ACT7 TATA FP           | CGGCTCCCGGGCTAATTCAT               |
| ACT7 TATA RP           | ACCGACGCGTCTATGTTGCC               |
| ACT7 3'CDS FP          | TGGTTGTGTCAAGAAGTCTTGTGT           |
| ACT7 3'CDS RP          | CAGCATCATCACAAAGCATCCTAAAG         |
| <b>Genomic DNA PCR</b> |                                    |
| SALK T-DNA             | TTGATTTGGGTGATGGTTCA               |
| SAIL T-DNA             | TAGCATCTGAATTTCATAACCAATCTCGATACAC |
| hls1-1 LP              | GGTTTGGCCACAAAGAAAAAG              |
| hls1-1 RP              | TATTCGGAGTTTCGTACACCG              |
| hls1-2 LP              | CATGAACTACTCGCTTCTCC               |
| hls1-2 RP              | GAGCTTAAACCCAATCCCTTG              |
